# Supplementary material for: Screening ionic liquids for dissolving hemicellulose by COSMO-RS based on the selective model
Source: Royal Society of Chemistry journal article supplement (doi:10.1039/d2ra02001g), 2022-01-01
Supplement: d2ra02001g1.pdf [file d2ra02001g1.pdf]

## SUPPLEMENTARY INFORMATION

### Screening ionic liquids for dissolving hemicellulose by COSMO-RS based on the selective model

Jinzheng Zhao, Guohui Zhou\*, Timing Fang, Shengzhe Ying, Xiaomin Liu\*

School of Chemistry and Chemical Engineering, Qingdao University, 308 Ningxia  
Road Shinan District, Qingdao, Shandong, 266071, P. R. China

\* Corresponding author.: liuxiaomin@qdu.edu.cn

**Table S1.** The molecular model and conformation of hemicellulose and ions

**Table S2.**  $R^2$ , RSS and Optimization time of the six hemicellulose models

**Table S3.** The  $R^2$  of the integral area and  $\ln\gamma$  of 38 kind anions in four intervals  
considered

**Figure S1.**  $\sigma$ -profile curves of hemicellulose and 38 anions.

**Table S1. The molecular model and conformation of hemicellulose and ions used in this work**

| No.  | Name of cation                                                                                        | Acronym                           | Conformation                                                                          |
|------|-------------------------------------------------------------------------------------------------------|-----------------------------------|---------------------------------------------------------------------------------------|
| 1-5  | 1-R-3-Methylimidazolium                                                                               | 1: [Mmim], R=methyl               | 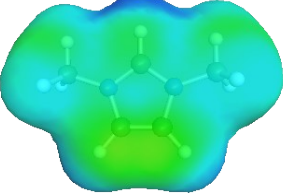   |
|      |                      | 2: [Amim], R=allyl                |    |
|      |                                                                                                       | 3: [HOEmim], R=2-hydroxyethyl     |   |
|      |                                                                                                       | 4: [EtOMmim], R=2-methoxyethyl    |  |
|      |                                                                                                       | 5: [EOEmim], R=2-ethoxy-2oxoethyl |  |
| 6-10 | N-R-Pyridinium<br> | 6: [Mpy], R=methyl                |  |

| No.   | Name of cation                                                                                                      | Acronym                           | Conformation                                                                          |
|-------|---------------------------------------------------------------------------------------------------------------------|-----------------------------------|---------------------------------------------------------------------------------------|
|       |                                                                                                                     | 7: [Apy], R=allyl                 | 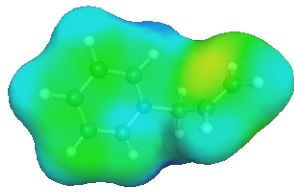   |
|       |                                                                                                                     | 8: [HOEtpy], R=2-hydroxyethyl     |    |
|       |                                                                                                                     | 9: [EtOMpy], R=2-methoxyethyl     |    |
|       |                                                                                                                     | 10: [EOEpy], R=2-ethoxy-2oxoethyl |  |
| 11-15 | 1R-1-Methylpyrrolidiniu<br>m<br> | 11: [Mpy], R=methyl               |  |
|       |                                                                                                                     | 12: [Apy], R=allyl                |  |
|       |                                                                                                                     | 13: [HOEtpy], R=2-hydroxyethyl    |  |

| No.   | Name of cation                                                                                                | Acronym                           | Conformation                                                                          |
|-------|---------------------------------------------------------------------------------------------------------------|-----------------------------------|---------------------------------------------------------------------------------------|
|       |                                                                                                               | 14: [EtOMpy], R=2-methoxyethyl    | 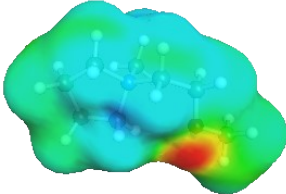   |
|       |                                                                                                               | 15: [EOEpy], R=2-ethoxy-2oxoethyl |    |
| 16-20 | 4-R-4-Ethylmorpholinium<br> | 16: [Memor], R=methyl             |    |
|       |                                                                                                               | 17: [Aemor], R=allyl              |  |
|       |                                                                                                               | 18: [HOEtemor], R=2-hydroxyethyl  |  |
|       |                                                                                                               | 19: [EtOMemor], R=2-methoxyethyl  |  |

| No.   | Name of cation                                                                                                | Acronym                            | Conformation                                                                          |
|-------|---------------------------------------------------------------------------------------------------------------|------------------------------------|---------------------------------------------------------------------------------------|
|       |                                                                                                               | 20:[EOEemor], R=2-ethoxy-2oxoethyl | 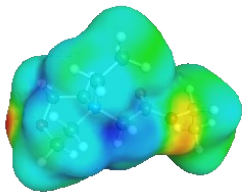   |
| 21-25 | 4-R-4-Methylmorpholinium<br> | 21: [Mmmor], R=methyl              |    |
|       |                                                                                                               | 22: [Ammor], R=allyl               |   |
|       |                                                                                                               | 23: [HOEmmor], R=2-hydroxyethyl    |  |
|       |                                                                                                               | 24: [EtOMmmor], R=2-methoxyethyl   |  |
|       |                                                                                                               | 25:[EOEmmor], R=2-ethoxy-2oxoethyl |  |

| No.   | Name of cation                                                                                               | Acronym                             | Conformation                                                                          |
|-------|--------------------------------------------------------------------------------------------------------------|-------------------------------------|---------------------------------------------------------------------------------------|
| 26-30 | R-ethyl-dimethylammoniu<br>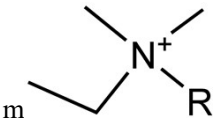 | 26: [Medmam], R=methyl              |    |
|       |                                                                                                              | 27: [Aedmam], R=allyl               |    |
|       |                                                                                                              | 28:[HOEtedmam], R=2-hydroxyethyl    |   |
|       |                                                                                                              | 29:[EtOMedmam], R=2-methoxyethyl    |  |
|       |                                                                                                              | 30:[EOEedmam], R=2-ethoxy-2oxoethyl |  |
| 31    | Benzyl-triphenyl-phosphonium                                                                                 | [Bentpho]                           |  |

| No. | Name of cation                      | Acronym    | Conformation                                                                          |
|-----|-------------------------------------|------------|---------------------------------------------------------------------------------------|
| 32  | Butyl-trihexyl-phosphonium          | [Butpho]   | 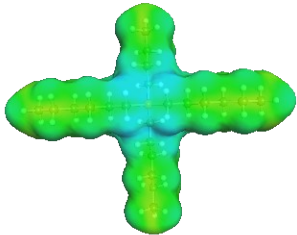   |
| 33  | Trihexyl(2-hydroxyethyl)phosphonium | [Thhpho]   |    |
| 34  | Trihexyl(methoxymethyl)-phosphonium | [Thmompho] |   |
| 35  | Choline                             | [Choline]  |  |
| 36  | Triethylamine                       | [Triam]    |  |

**The conformation of anions studied in this work**

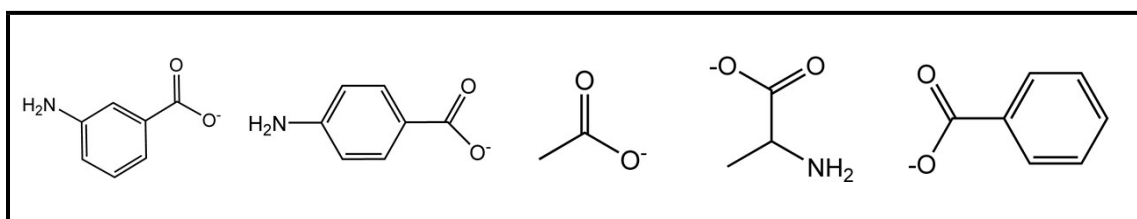

|                                                                                     |                                                                                     |                                                                                     |                                                                                      |                                                                                       |
|-------------------------------------------------------------------------------------|-------------------------------------------------------------------------------------|-------------------------------------------------------------------------------------|--------------------------------------------------------------------------------------|---------------------------------------------------------------------------------------|
| 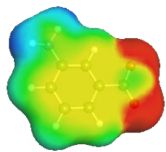   |    |    |    |    |
| 1.[Oabc]⁻                                                                           | 2.[Pabc]⁻                                                                           | 3.[Ac]⁻                                                                             | 4.[Ala]⁻                                                                             | 5.[BEN]⁻                                                                              |
|    |    |    |    |    |
|    |    |    |    |    |
| 6.[BF <sub>4</sub> ] <sup>-</sup>                                                   | 7.[TF <sub>2</sub> N] <sup>-</sup>                                                  | 8.[Br] <sup>-</sup>                                                                 | 9.[Cl] <sup>-</sup>                                                                  | 10.[BuSO <sub>4</sub> ] <sup>-</sup>                                                  |
|   |   |   |   |   |
|  |  |  |  |  |
| 11.[Clpol]⁻                                                                         | 12.[DBP]⁻                                                                           | 13.[ClO <sub>4</sub> ] <sup>-</sup>                                                 | 14.[N(CN) <sub>2</sub> ] <sup>-</sup>                                                | 15.[DEP]⁻                                                                             |
|  |  |  |  |  |



|                                                                                     |                                                                                     |                                                                                     |                                                                                      |                                                                                       |
|-------------------------------------------------------------------------------------|-------------------------------------------------------------------------------------|-------------------------------------------------------------------------------------|--------------------------------------------------------------------------------------|---------------------------------------------------------------------------------------|
| 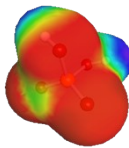   |    |    |    |    |
| 16.[DHP] <sup>-</sup>                                                               | 17.[DMSO <sub>2</sub> ] <sup>-</sup>                                                | 18.[DMPO <sub>4</sub> ] <sup>-</sup>                                                | 19.[DMSO] <sup>-</sup>                                                               | 20.[DMBA] <sup>-</sup>                                                                |
|    |    |    |    |    |
|   |    |    |    |    |
| 21.[MeSO <sub>4</sub> ] <sup>-</sup>                                                | 22.[HSO <sub>4</sub> ] <sup>-</sup>                                                 | 23.[HCOO] <sup>-</sup>                                                              | 24.[Gly] <sup>-</sup>                                                                | 25.[MeHOCOO] <sup>-</sup>                                                             |
|  |  |  |  |  |
|  |  |  |  |  |
| 26.[Isoec] <sup>-</sup>                                                             | 27.[EtHOCOO] <sup>-</sup>                                                           | 28.[I] <sup>-</sup>                                                                 | 29.[MeHSCOO] <sup>-</sup>                                                            | 30.[lev] <sup>-</sup>                                                                 |
|  |  |  |  |  |

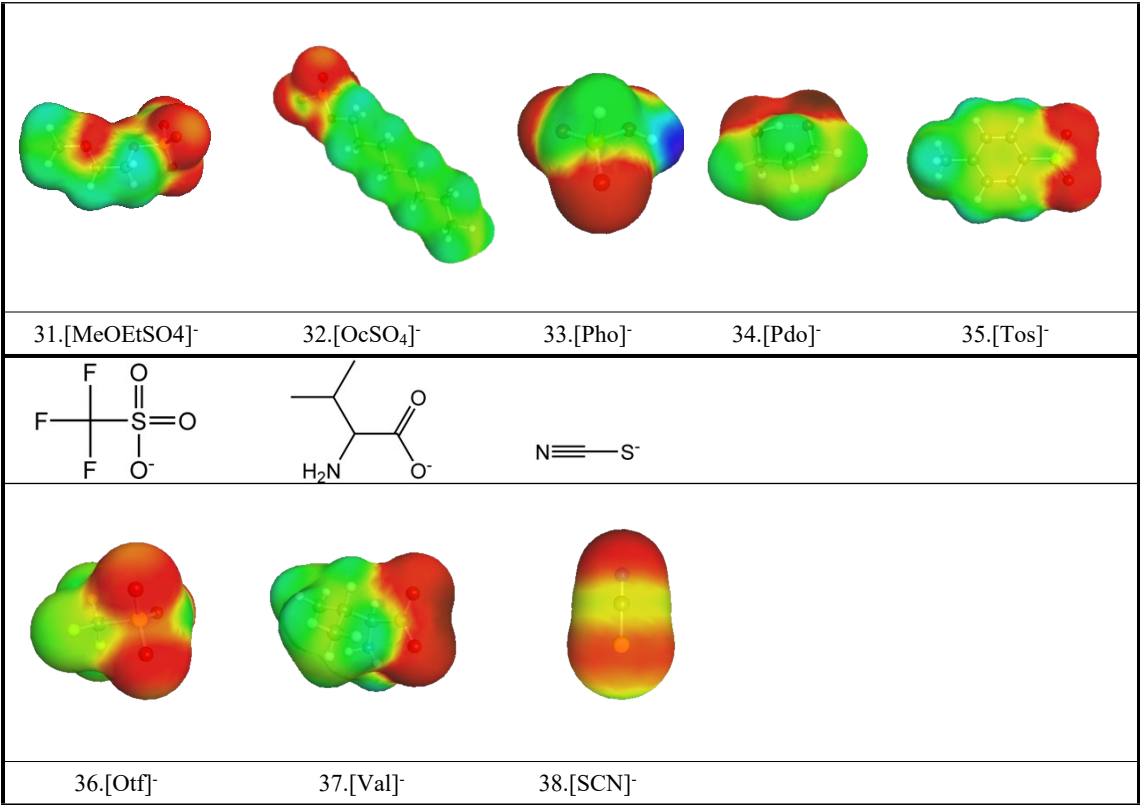

## The conformation of hemicellulose models studied in this work

**Model 1**

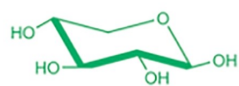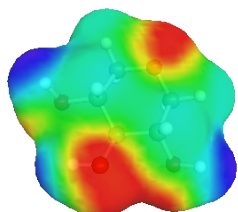

**Model 2**

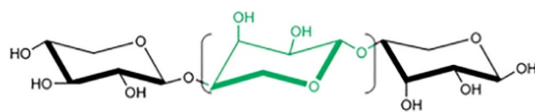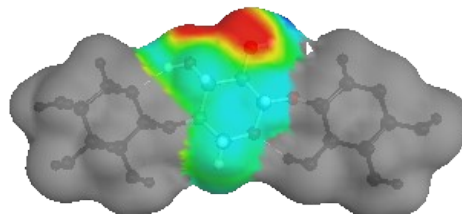

**Model 3**

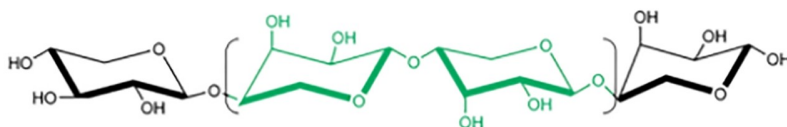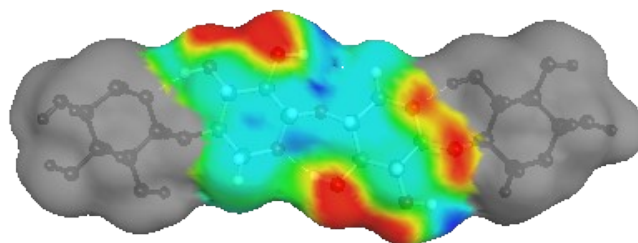

**Model 4**

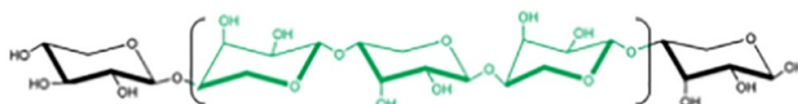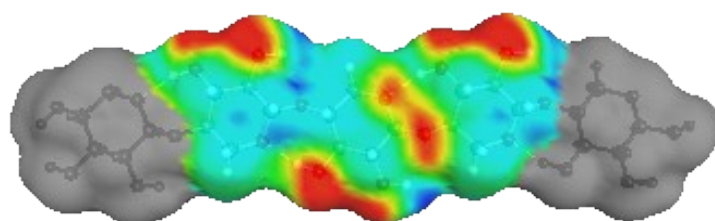

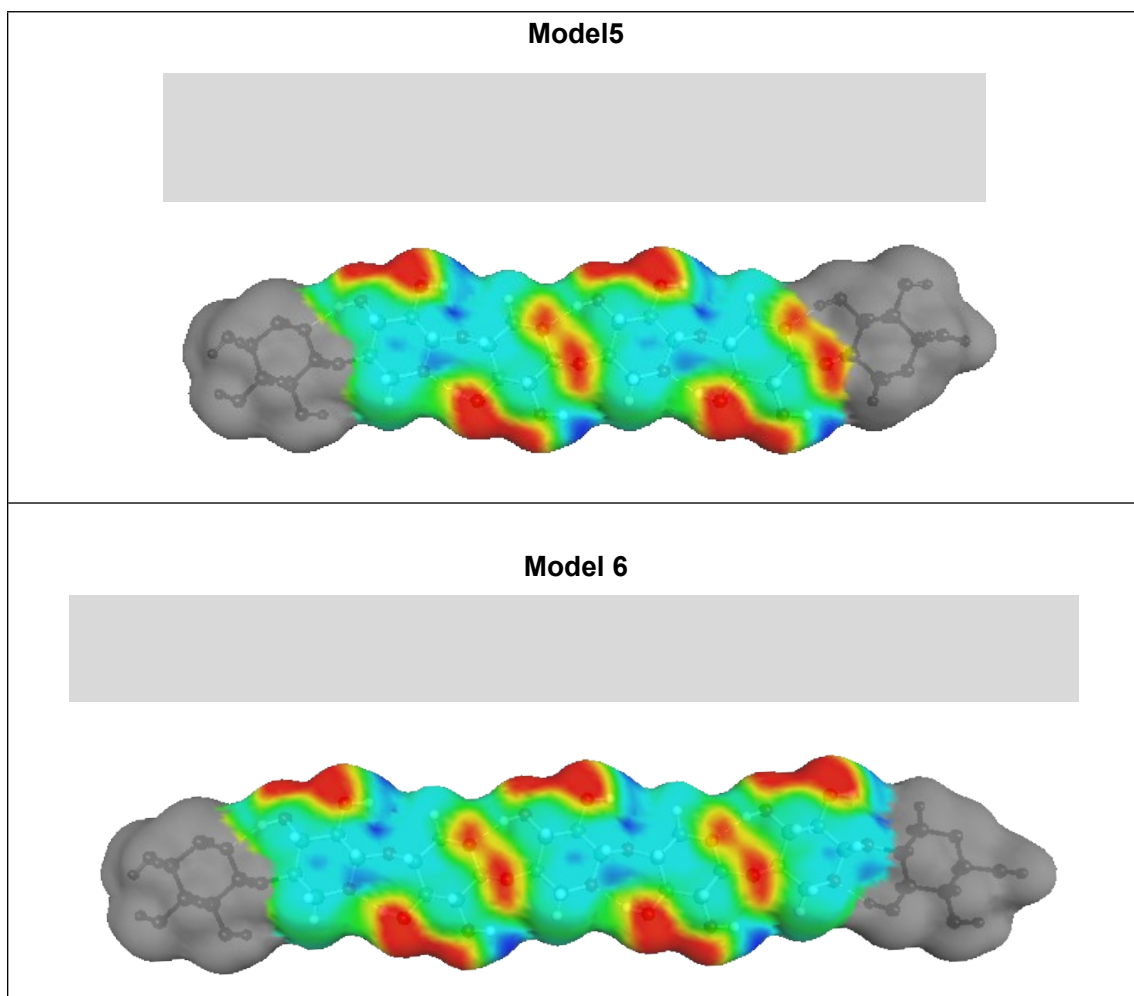

**Table S2. R<sup>2</sup>, RSS and Optimization time of the six hemicellulose models**

|                        | <b>Model 1</b> | <b>Model 2</b> | <b>Model 3</b> | <b>Model 4</b> | <b>Model 5</b> | <b>Model 6</b> |
|------------------------|----------------|----------------|----------------|----------------|----------------|----------------|
| R <sup>2</sup>         | 0.162          | 0.648          | 0.824          | 0.827          | 0.828          | 0.828          |
| RSS                    | 15.43          | 0.09           | 0.20           | 0.51           | 0.96           | 1.57           |
| Optimization time(min) | 6              | 56             | 176            | 434            | 678            | 790            |

**Table S3. The R<sup>2</sup> of the integral area and lny of 38 kind anions in four intervals considered.**

| <b>Region</b>  | +0.015~+0.021 | <b>+0.016~+0.021</b> | +0.015~+0.022 | +0.016~+0.022 |
|----------------|---------------|----------------------|---------------|---------------|
| R <sup>2</sup> | 0.703         | <b>0.779</b>         | 0.622         | 0.630         |

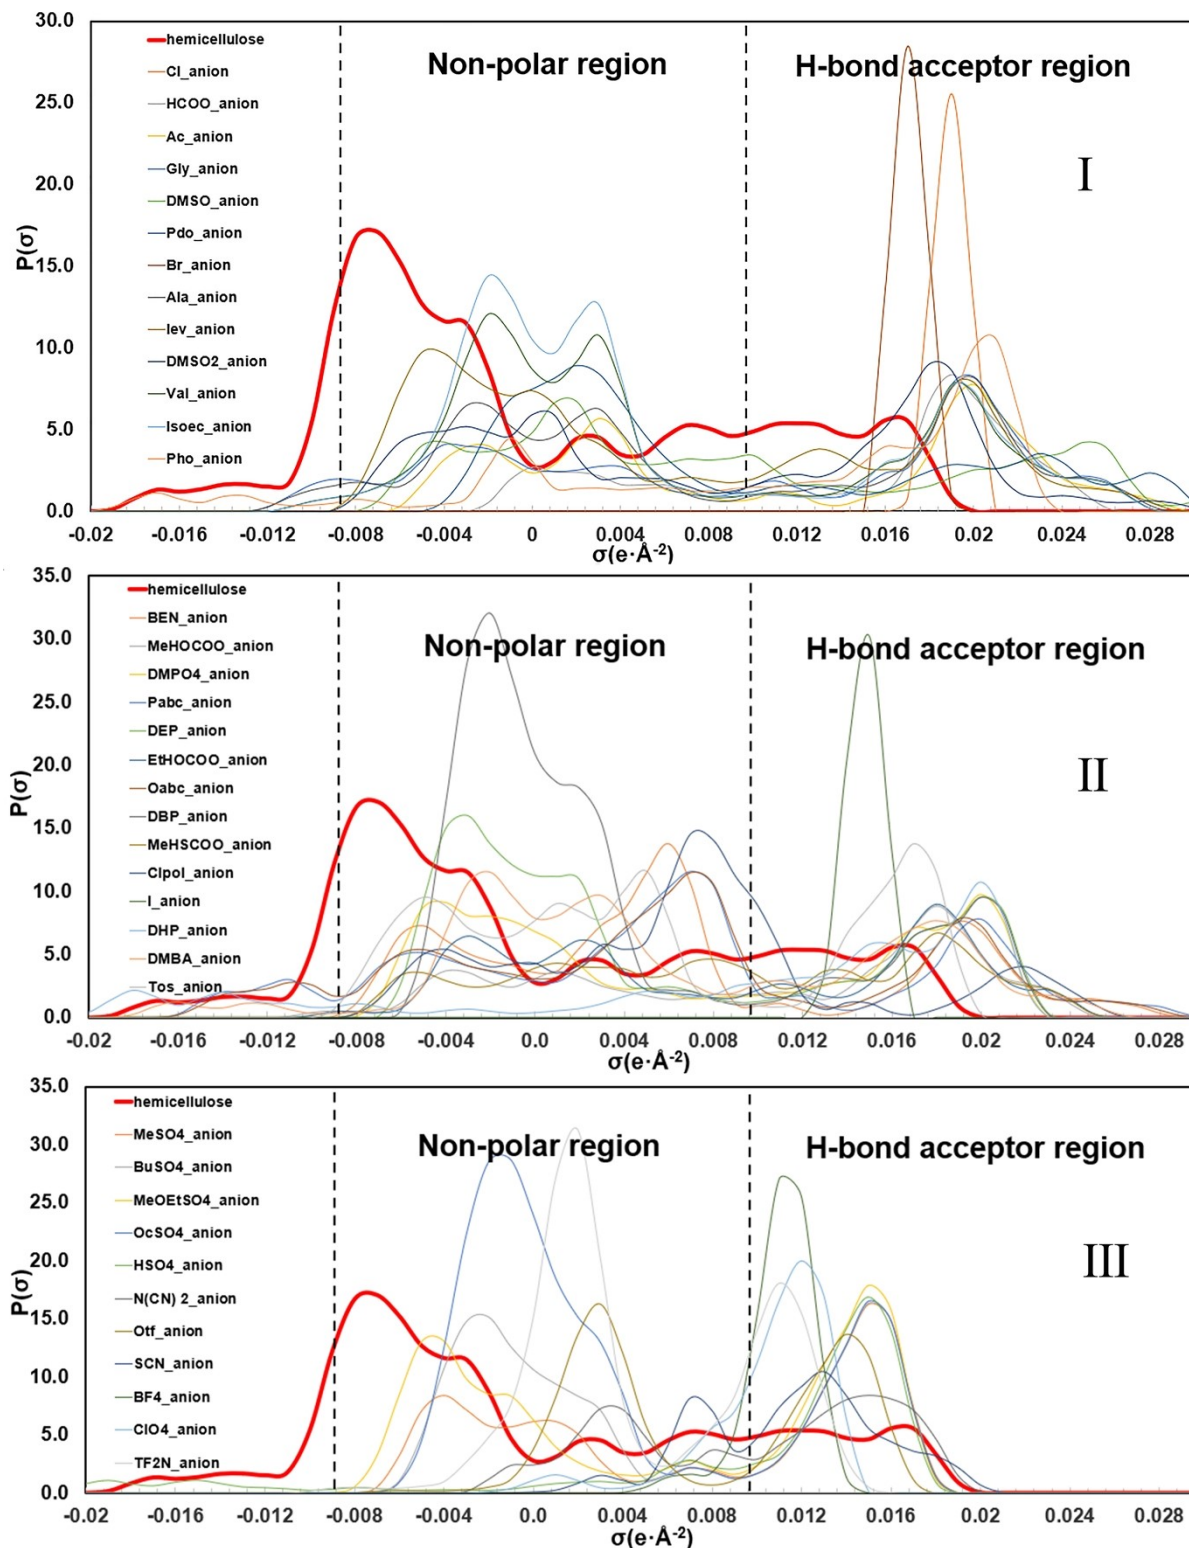

**Figure S1.**  $\sigma$ -profile curves of hemicellulose and 38 anions. The red curve is the  $\sigma$ -profile of the hemicellulose model. The anions are divided into three groups according to the order of activity coefficients.
